# Supplementary material for: Gold-catalyzed regioselective oxidation of terminal allenes: formation of α-methanesulfonyloxy methyl ketones
Source: PubMed Central journal article supplement (PMC3107496; doi:10.3762/bjoc.7.69), 2011-05-11

## Supporting Information File 2

for

### **Gold-catalyzed regioselective oxidation of terminal allenes: formation of $\alpha$ -methanesulfonyloxy methyl ketones**

Yingdong Luo, Guozhu Zhang, Erik S. Hwang, Thomas A. Wilcoxon and Liming Zhang\*

Address: Department of Chemistry and Biochemistry, University of California, Santa  
Barbara, California, 93106, USA

Email: Liming Zhang- [zhang@chem.ucsb.edu](mailto:zhang@chem.ucsb.edu)

\* Corresponding author

**NMR spectra of compounds**

lyd-1-212-4

File: nmr400/Zhang/Yluo/lyd-1-212-4.fid

Pulse Sequence: s2pul1

Solvent: cdcl3

Ambient temperature

Operator: Yluo

File: lyd-1-212-4

INOVA-500 "nmrserver"

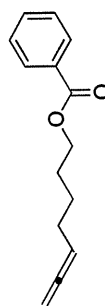

1c

Relax. delay 4.800 sec  
Pulse 75.0 degrees  
Acq. time 2.500 sec  
Width 8002.4 Hz  
36 repetitions  
OBSERVE H1, 399.9486723 MHz  
DATA PROCESSING  
Line broadening 0.2 Hz  
FT size 65536  
Total time 14 min, 39 sec

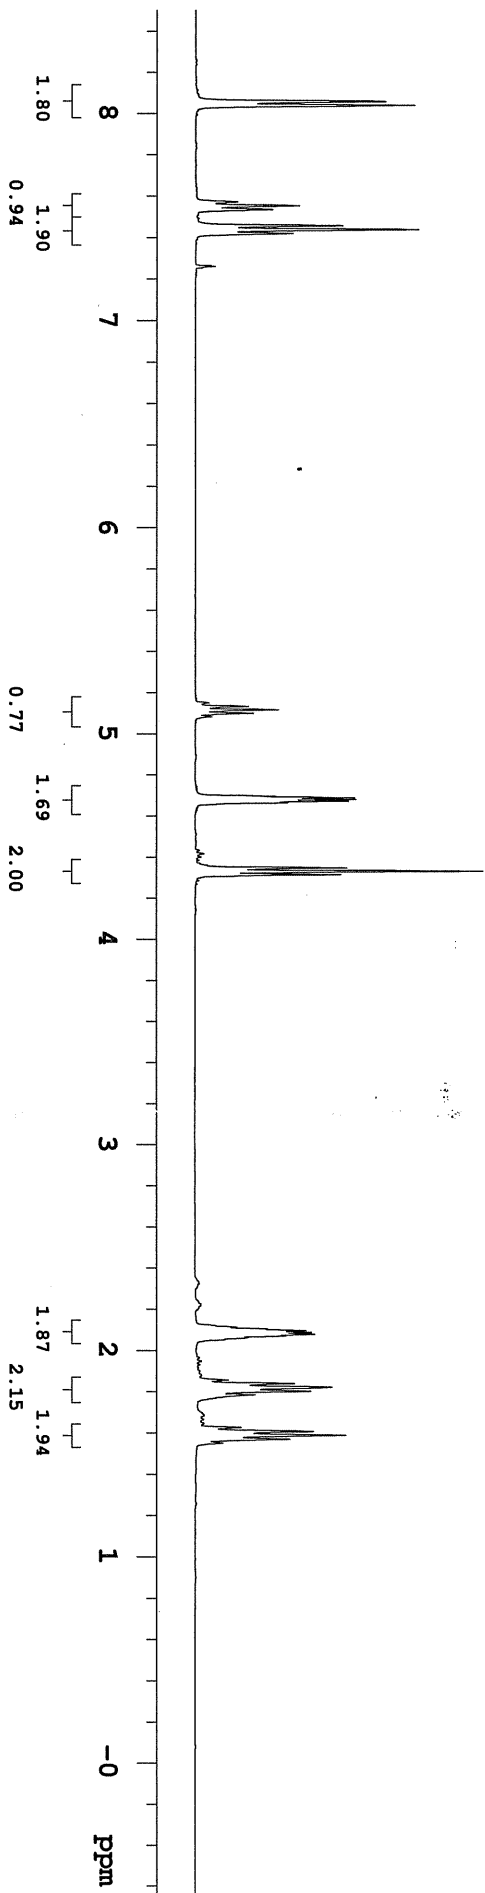

lyd-1-212-4-c

File: nmr400/Zhang/Yluc/lyd-1-212-4-c.fid

Pulse Sequence: s2pul1

Solvent: cdcl3

Ambient temperature

Operator: yluc

File: lyd-1-212-4-c

INOVA-500 "nmrserver"

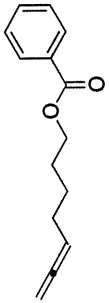

1c

Relax. delay 1.300 sec  
Pulse 53.8 degrees  
Acq. time 1.000 sec  
Width 28040.7 Hz  
116 repetitions  
OBSERVE C13, 100.5671787 MHz  
DECOUPLE H1, 399.9506784 MHz  
Power 40 dB  
continuously on  
WALTZ-16 modulated  
DATA PROCESSING  
Line broadening 1.0 Hz  
FT size 65536  
Total time 6 hr, 24 min, 59 sec

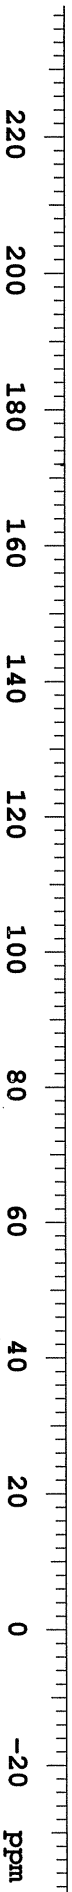

1yd-1-212-C12

File: xp

Pulse Sequence: s2pu1

Solvent: cdcl3

Ambient temperature

Operator: Yluo

INOVA-500 "nmr500"

Relax. delay 4.800 sec

Pulse 74.9 degrees

Acq. time 2.500 sec

Width 8002.4 Hz

12 repetitions

OBSERVE H1, 499.8560510 MHz

DATA PROCESSING

Line broadening 0.2 Hz

FT size 32768

Total time 14 min, 37 sec

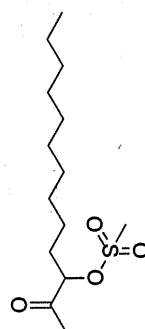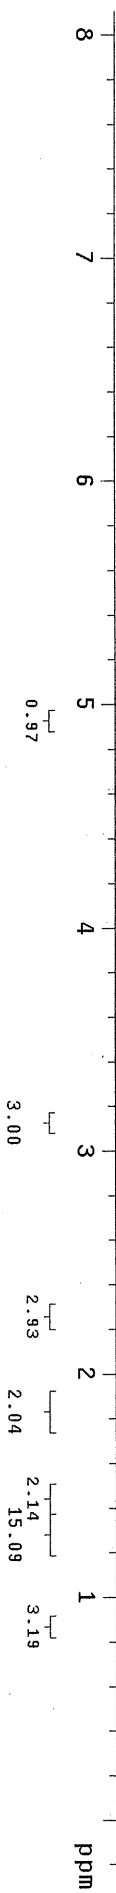

lyd-1-212-C12-c

File: xp

Pulse Sequence: s2pu1

Solvent: cdcl3

Ambient temperature

Operator: yluo

INOVA-400 "nmr400"

Relax. delay 1.300 sec

Pulse 53.8 degrees

Acq. time 1.000 sec

Width 28040.7 Hz

188 repetitions

OBSERVE C13, 100.5671761 MHz

DECUPLE H1, 399.9506784 MHz

Power 40 db

continuously on

WALTZ-16 modulated

DATA PROCESSING

Line broadening 1.0 Hz

FT size 65536

Total time 7 hr, 41 min, 56 sec

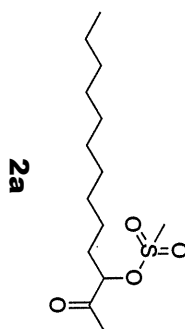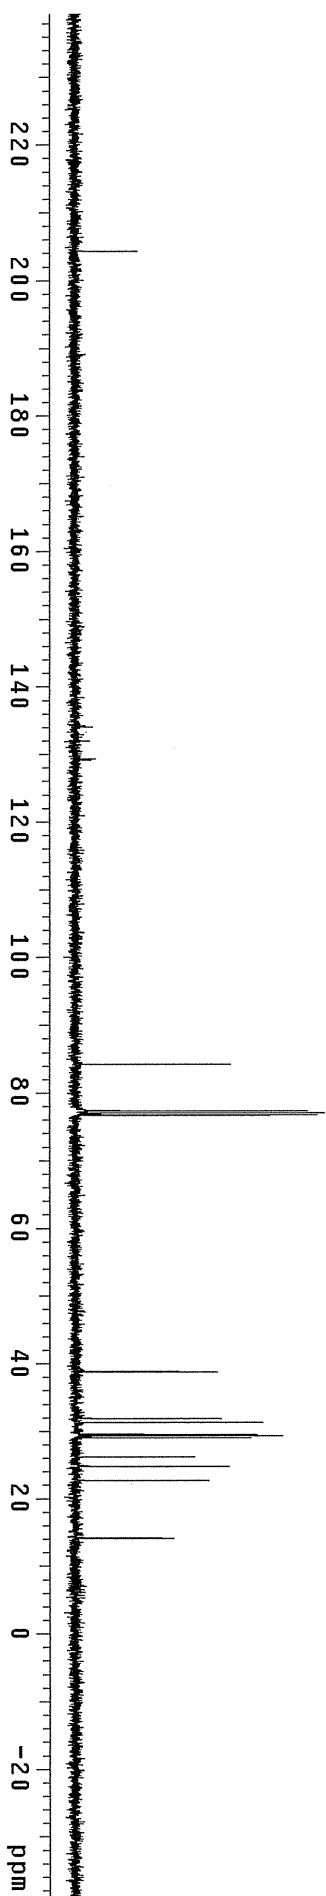

lyd-1-204

File: nmr500/Zhang/Yluo/lyd-1-204.fid

Pulse Sequence: s2pul1

Solvent: cdcl3

Ambient temperature

Operator: yluo

File: lyd-1-204

INOVA-500 "nmrserver"

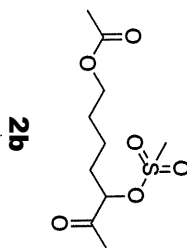

Relax. delay 4.800 sec  
Pulse 74.9 degrees  
Acq. time 2.500 sec  
Width 8002.4 Hz  
8 repetitions  
OBSERVE H1, 499.8560510 MHz  
DATA PROCESSING  
Line broadening 0.2 Hz  
FT size 32768  
Total time 0 min, 0 sec

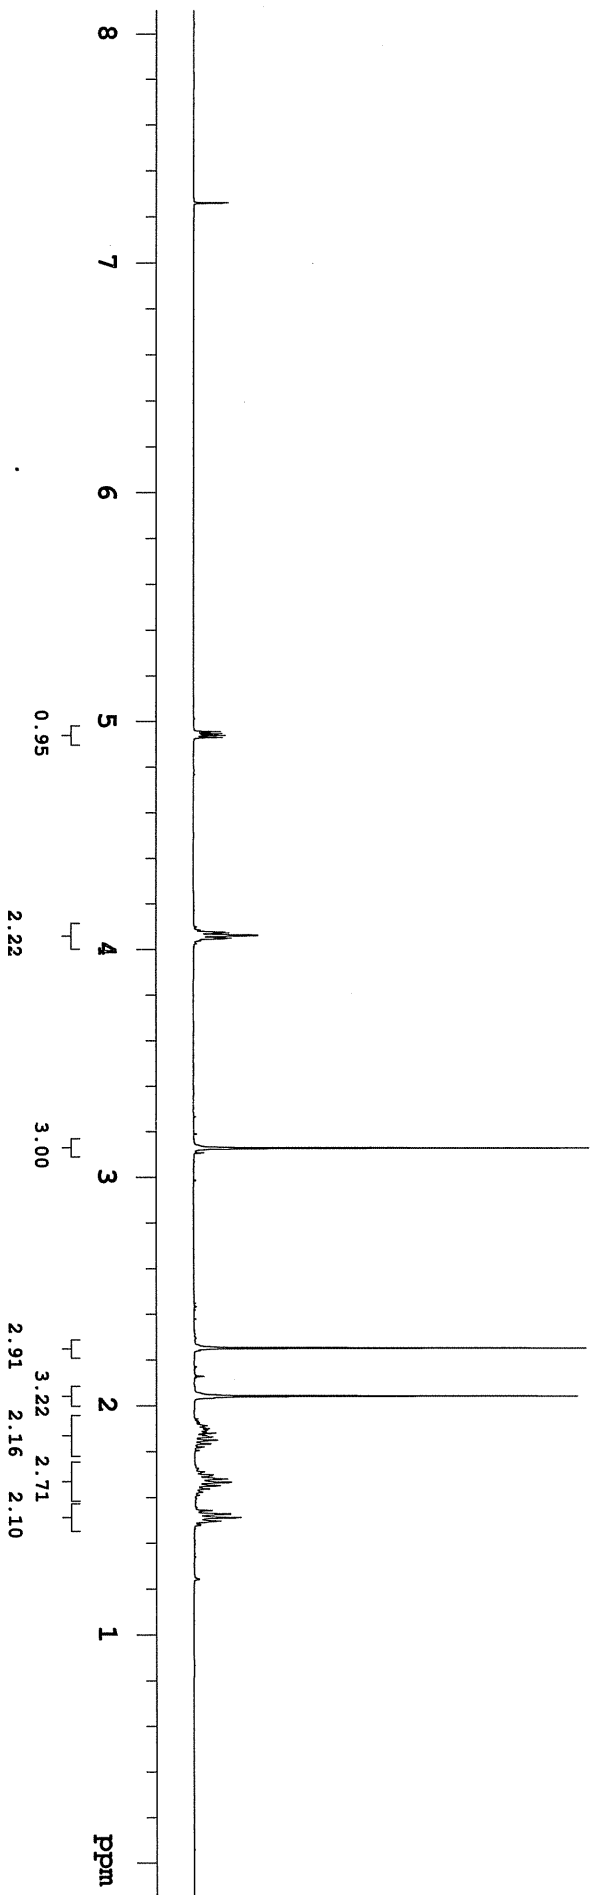

lyd-1-204-c

File: mmr400/Zhang/Yluo/lyd-1-204-c.fid

Pulse Sequence: s2pul

Solvent: cdcl3

Ambient temperature

Operator: Yluo

File: lyd-1-204-c

INOVA-500 "nmrserver"

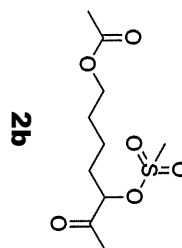

Relax. delay 1.300 sec  
Pulse 53.8 degrees  
Acq. time 1.000 sec  
Width 28040.7 Hz  
1012 repetitions  
OBSERVE C13, 100.5671770 MHz  
DECOUPLE H1, 399.9506784 MHz  
Power 40 dB  
continuously on  
WALTZ-16 modulated  
DATA PROCESSING  
Line broadening 1.0 Hz  
FT size 65536  
Total time 6 hr, 24 min, 59 sec

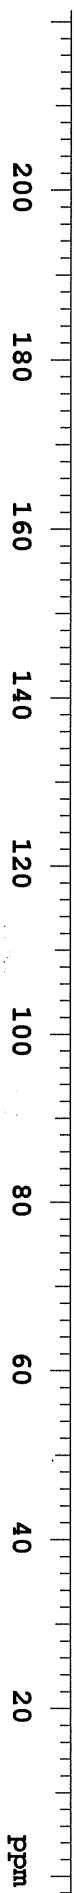

lyd-1-206-1

File: nmr500/Zhang/y1uo/lyd-1-206-1.fid

Pulse Sequence: s2pul

Solvent: cdcl3

Ambient temperature

Operator: y1uo

File: lyd-1-206-1

INOVA-500 "nmrserver"

Relax. delay 4.800 sec

Pulse 74.9 degrees

Acq. time 2.500 sec

Width 8002.4 Hz

12 repetitions

OBSERVE H1, 499.8560510 MHz

DATA PROCESSING

Line broadening 0.2 Hz

FW size 32768

Total time 0 min, 0 sec

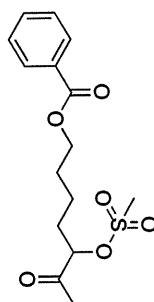

2c

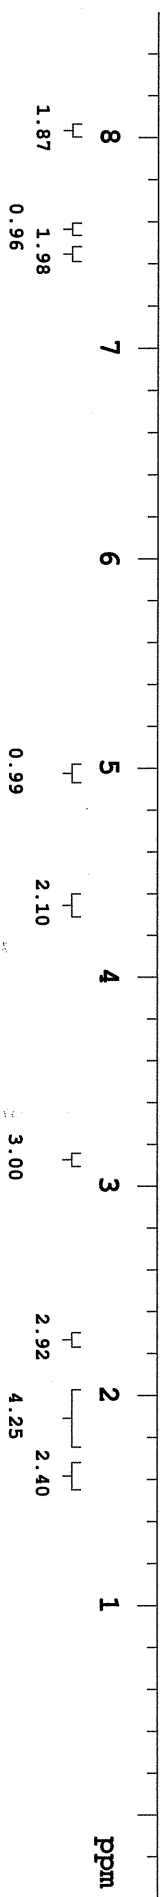



lyd-1-206-1-c

File: nmr400/Zhang/y1uo/lyd-1-206-1-c.fid

Pulse Sequence: s2pul1

Solvent: cdcl3  
Ambient temperature  
Operator: y1uo  
File: lyd-1-206-1-c  
INOVA-500 "nmrserver"

Relax. delay 1.300 sec  
Pulse 53.8 degrees  
Acq. time 1.000 sec  
Width 28040.7 Hz  
1024 repetitions  
OBSERVE C13, 100.5671761 MHz  
DECOUPLE H1, 399.9506784 MHz  
Power 40 dB  
continuously on  
WALTZ-16 modulated  
DATA PROCESSING  
Line broadening 1.0 Hz  
FT size 65536  
Total time 7 hr, 41 min, 56 sec

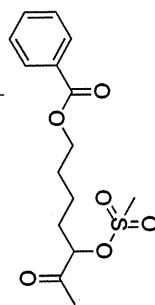

2c

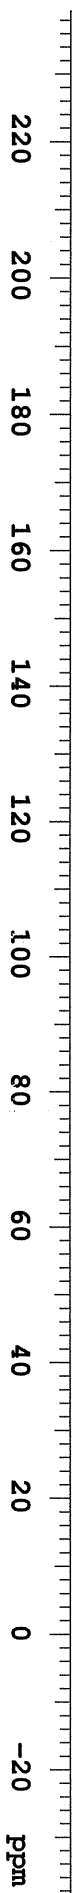

lyd-1-212-1

File: nmr400/Zhang/Yluo/lyd-1-212-1.fid

Pulse Sequence: s2pul

Solvent: cdcl3

Ambient temperature

Operator: yluo

File: lyd-1-212-1

INOVA-500 "nmrserver"

**2d**

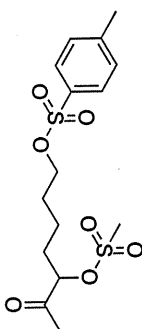

Relax. delay 4.800 sec  
Pulse 75.0 degrees  
Acq. time 2.500 sec  
Width 8002.4 Hz  
8 repetitions  
OBSERVE H1, 399.9486723 MHz  
DATA PROCESSING  
Line broadening 0.2 Hz  
FT size 65536  
Total time 14 min, 39 sec

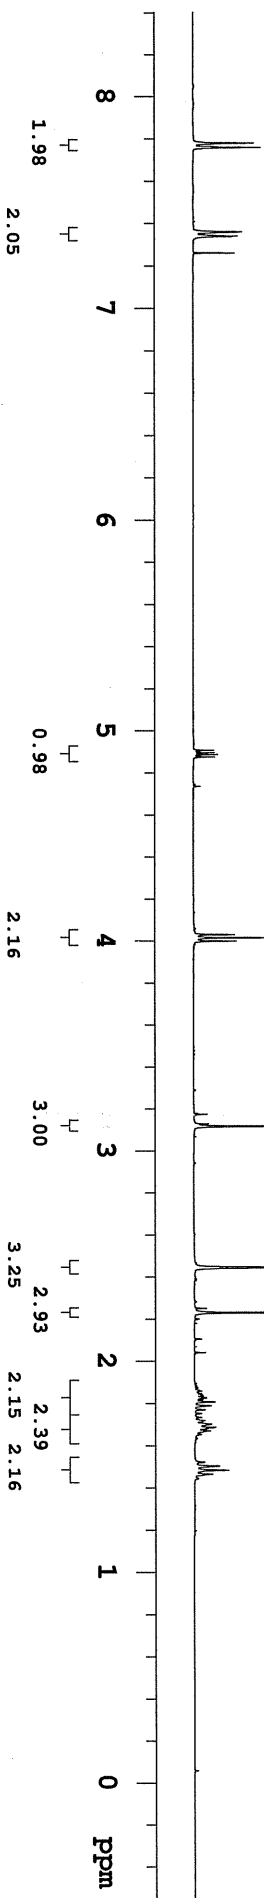

lyd-1-212-1-c

File: nmr400/Zhang/y1uo/lyd-1-212-1-c.fid

Pulse Sequence: s2pul

Solvent: cdc13

Ambient temperature

Operator: y1uo

File: lyd-1-212-1-c

INOVA-500 "mrserver"

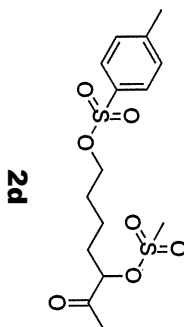

2d

Relax. delay 1.300 sec

Pulse 53.8 degrees

Acq. time 1.000 sec

Width 28040.7 Hz

52 repetitions

OBSERVE C13, 100.5671796 MHz

DECOUPLE H1, 399.9506784 MHz

Power 40 dB

continuously on

WALTZ-16 modulated

DATA PROCESSING

Line broadening 1.0 Hz

FT size 65536

Total time 7 hr, 41 min, 56 sec

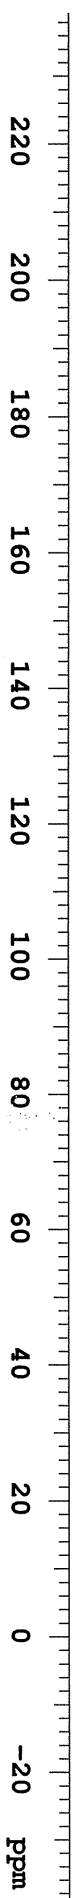

Standard c13 run using gmp probe

File: nmr400/Zhang/Yluo/Yld-1-208-4.fid

Pulse Sequence: s2pul

Solvent: cdcl3

Ambient temperature

Operator: Yluo

File: Yld-1-208-4

INOVA-500 "mrserver"

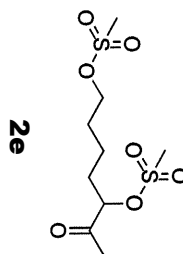

Relax. delay 1.300 sec

Pulse 53.8 degrees

Acq. time 1.000 sec

Width 28040.7 Hz

1312 repetitions

OBSERVE C13, 100.5671752 MHz

DECOUPLE H1, 399.9506784 MHz

Power 40 dB

continuously on

WALTZ-16 modulated

DATA PROCESSING

Line broadening 1.0 Hz

FW size 65536

Total time 6 hr, 24 min, 59 sec

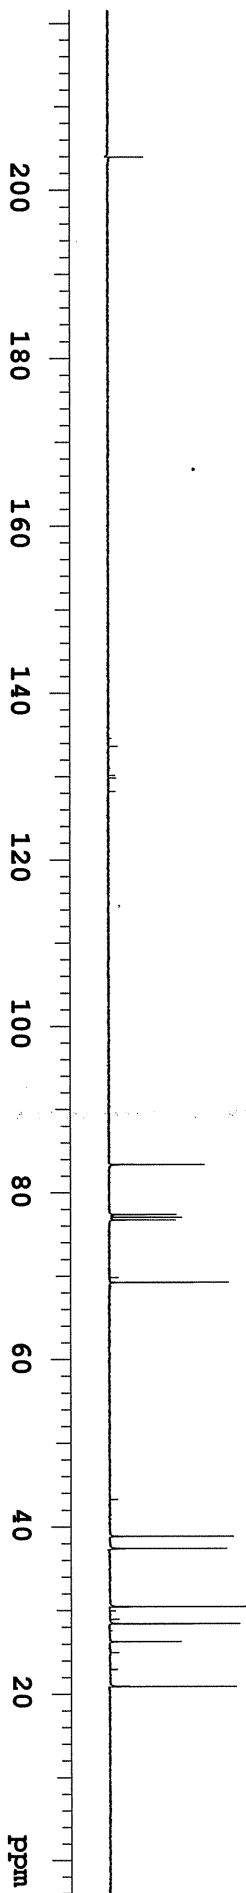

lyd-1-208-4

File: nmr500/Zhang/Yluo/lyd-1-208-4.fid

Pulse Sequence: s2pul1

Solvent: cdcl3

Ambient temperature

Operator: yluo

File: lyd-1-208-4

INOVA-500 "nmrserver"

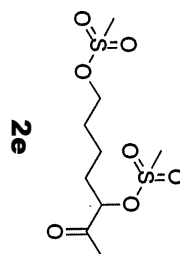

Relax. delay 4.800 sec  
Pulse 74.9 degrees  
Acq. time 2.500 sec  
Width 8002.4 Hz  
16 repetitions  
OBSERVE H1, 499.8560510 MHz  
DATA PROCESSING  
Line broadening 0.2 Hz  
FT size 32768  
Total time 0 min, 0 sec

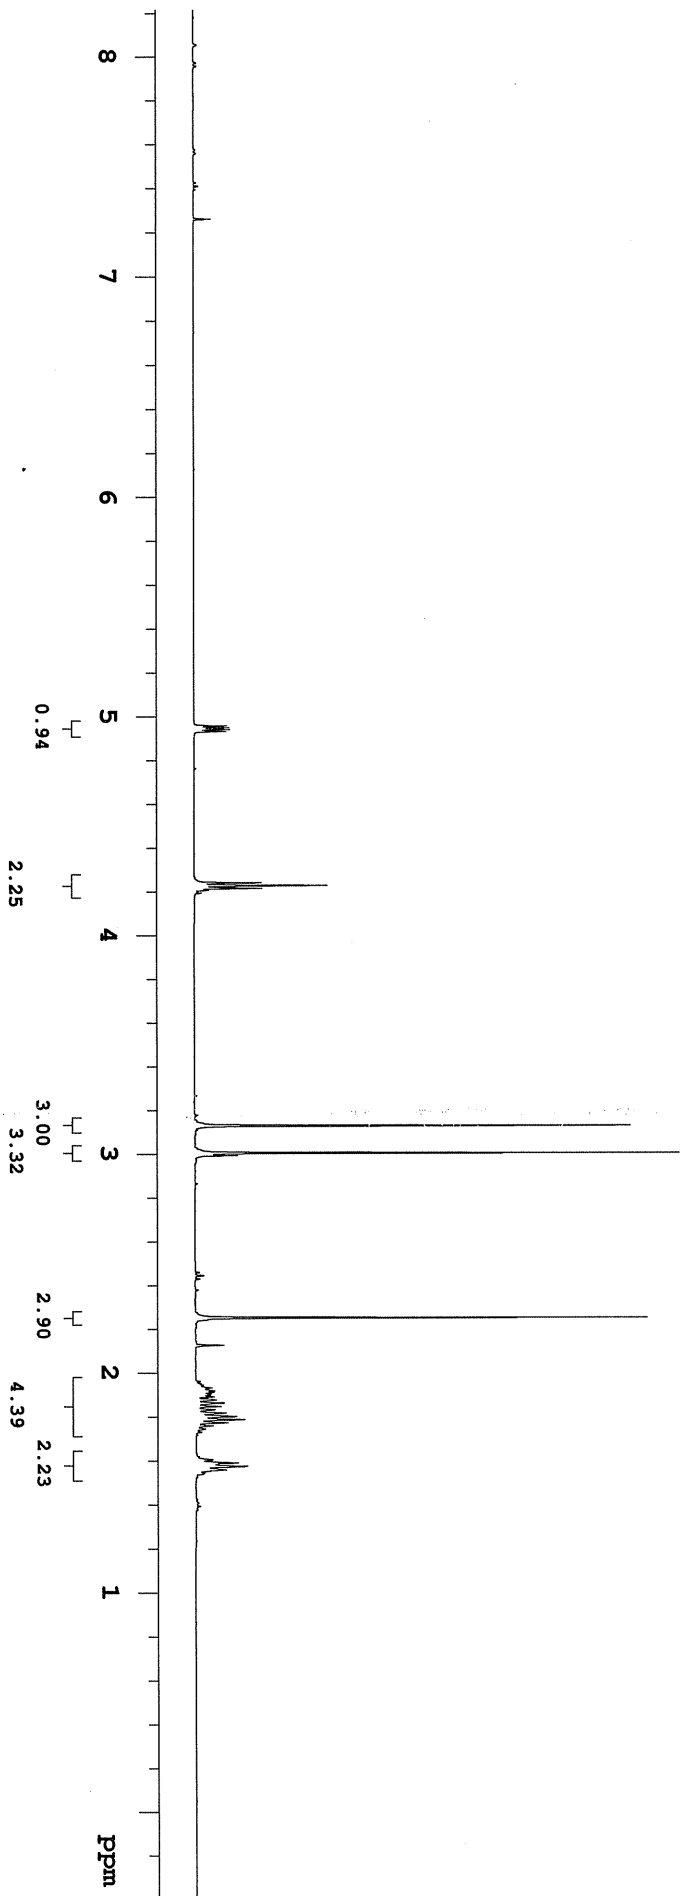

lyd-1-206-2

File: nmr500/Zhang/y1uo/lyd-1-206-2.fid

Pulse Sequence: s2pul1

Solvent: cdcl3

Ambient temperature

Operator: y1uo

File: lyd-1-206-2

INOVA-500 "nmrserver"

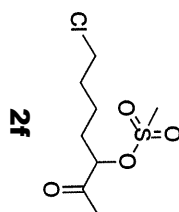

Relax. delay 4.800 sec  
Pulse 74.9 degrees  
Acq. time 2.500 sec  
Width 8002.4 Hz  
12 repetitions  
OBSERVE H1, 499.8560510 MHz  
DATA PROCESSING  
Line broadening 0.2 Hz  
FT size 32768  
Total time 0 min, 0 sec

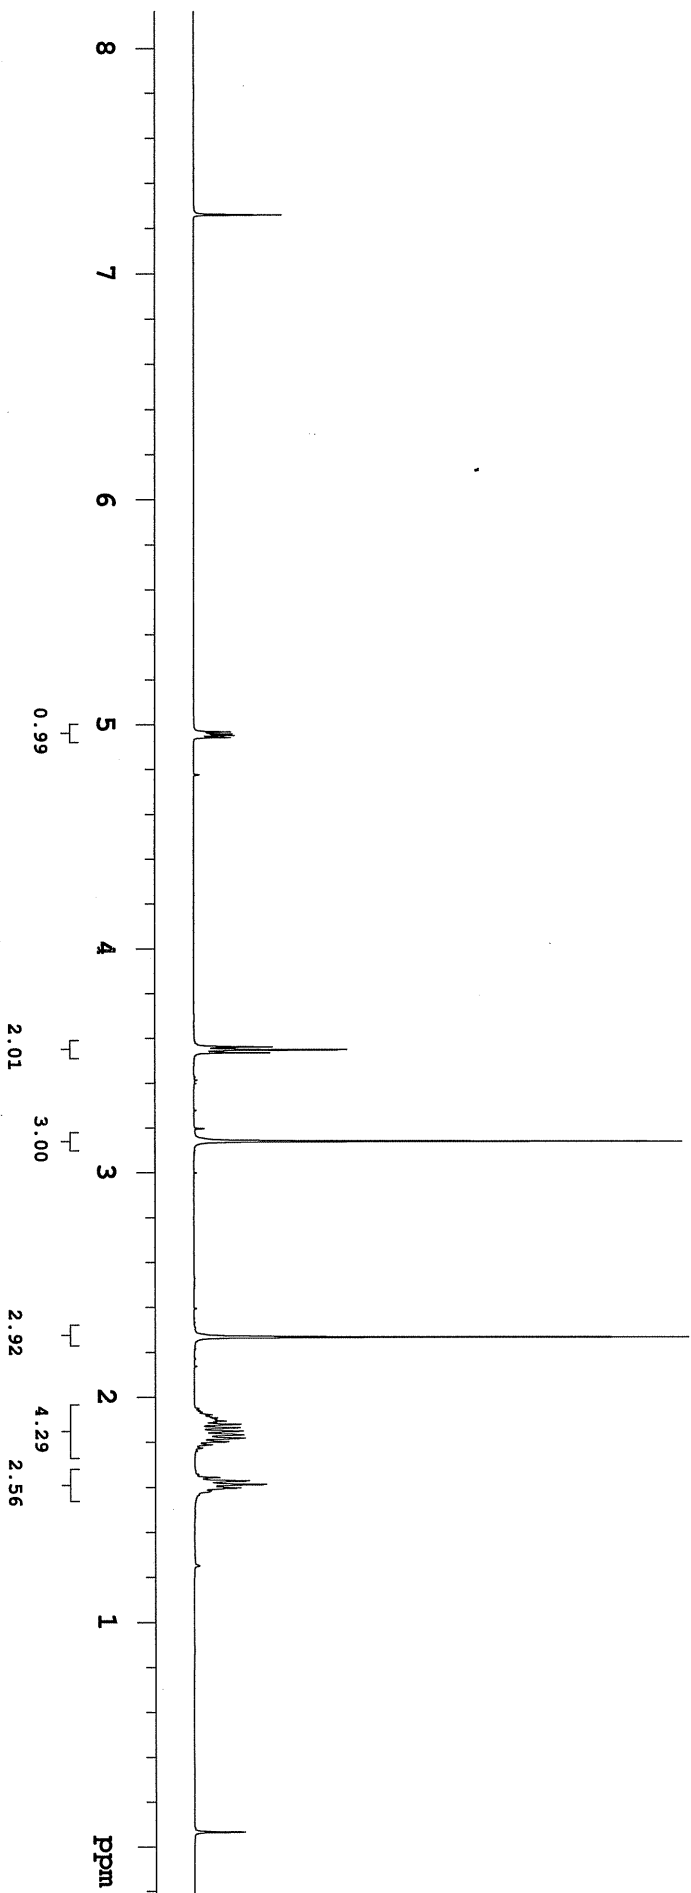

lyd-1-206-2-c

File: mmr400/Zhang/y1uo/lyd-1-206-2-c.fid

Pulse Sequence: s2pul

Solvent: cdc13

Ambient temperature

Operator: y1uo

File: lyd-1-206-2-c

INOVA-500 "mrsrverr"

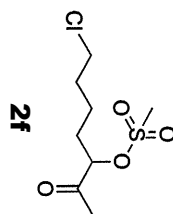

Relax. delay 1.300 sec

Pulse 53.8 degrees

Acq. time 1.000 sec

Width 28040.7 Hz

1028 repetitions

OBSERVE C13, 100.5671761 MHz

DECOUPLE H1, 399.9506784 MHz

Power 40 dB

continuously on

WALTZ-16 modulated

DATA PROCESSING

Line broadening 1.0 Hz

FT size 65536

Total time 46 min, 21 sec

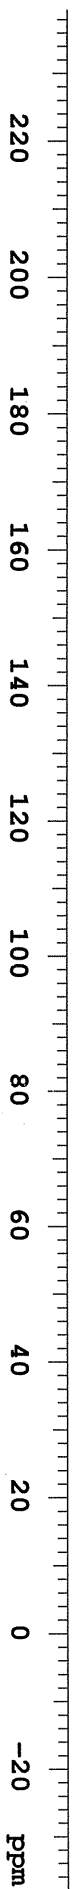

lyd-1-206-3

File: nmr500/zhang/yliuo/lyd-1-206-3.fid

Pulse Sequence: s2pul

Solvent: cdcl3

Ambient temperature

Operator: yliuo

File: lyd-1-206-3

INOVA-500 "nmrserver"

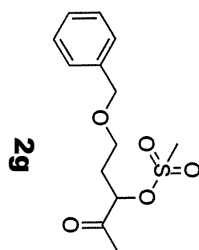

2g

Relax. delay 4.800 sec  
Pulse 74.9 degrees  
Acq. time 2.500 sec  
Width 8002.4 Hz  
16 repetitions  
OBSERVE H1, 499.8560510 MHz  
DATA PROCESSING  
Line broadening 0.2 Hz  
Fw size 32768  
Total time 0 min, 0 sec

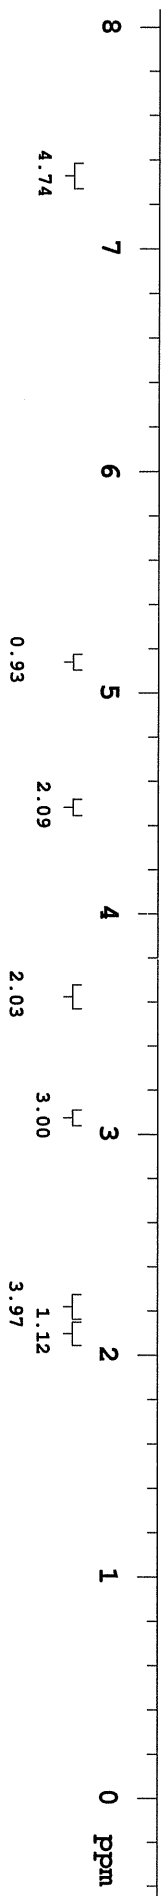



lyd-1-206-3-c

File: nmr400/zhang/y1uo/lyd-1-206-3-c.fid

Pulse Sequence: s2pul

Solvent: cdcl3

Ambient temperature

Operator: y1uo

File: lyd-1-206-3-c

INOVA-500 "nmrserver"

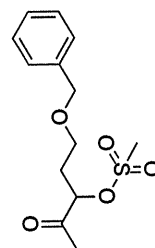

2g

Relax. delay 1.300 sec  
Pulse 53.8 degrees  
Acq. time 1.000 sec  
Width 28040.7 Hz  
756 repetitions  
OBSERVE C13, 100.5671770 MHz  
DECOUPLE H1, 399.9506784 MHz  
Power 40 dB  
continuously on  
WALTZ-16 modulated  
DATA PROCESSING  
Line broadening 1.0 Hz  
F1 size 65536  
Total time 7 hr, 41 min, 56 sec

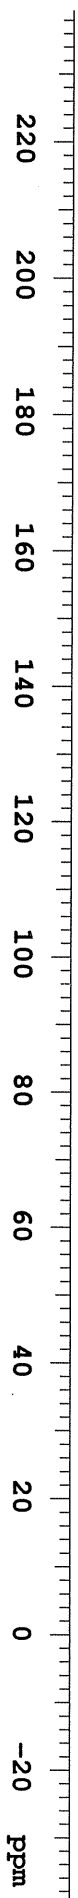

lyd-1-208-1

File: nmr500/Zhang/Yluc/lyd-1-208-1.fid

Pulse Sequence: s2pul1

Solvent: cdcl3

Ambient temperature

Operator: Yluc

File: lyd-1-208-1

INOVA-500 "nmrserver"

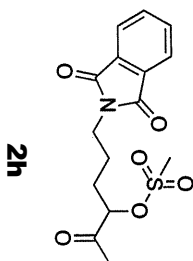

Relax. delay 4.800 sec  
Pulse 74.9 degrees  
Acq. time 2.500 sec  
Width 8002.4 Hz  
12 repetitions  
OBSERVE H1, 499.8560510 MHz  
DATA PROCESSING  
Line broadening 0.2 Hz  
FW size 32768  
Total time 0 min, 0 sec

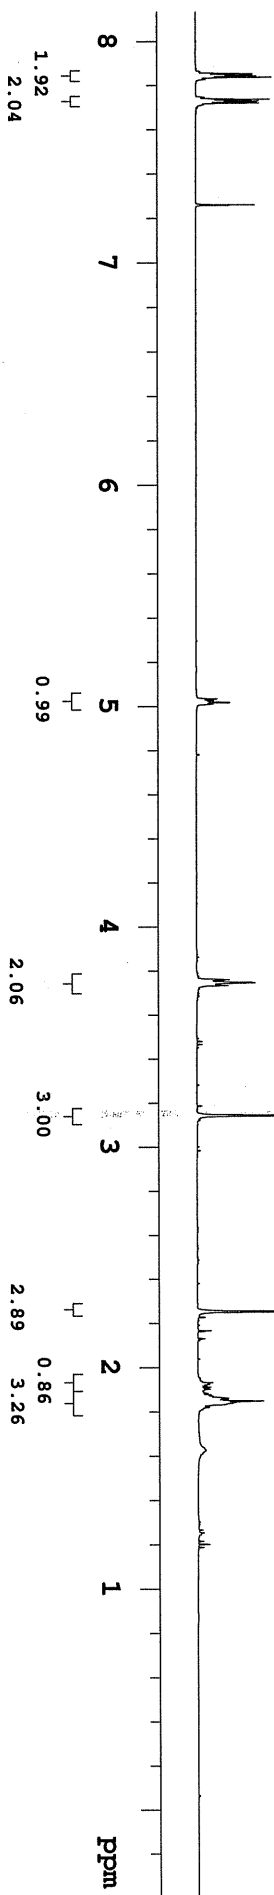

lyd-1-208-1-c

File: mmr400/Zhang/Yluo/lyd-1-208-1-c.fid

Pulse Sequence: s2pul

Solvent: cdcl3

Ambient temperature

Operator: Yluo

File: lyd-1-208-1-c

INOVA-500 "nmrserver"

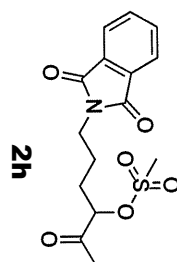

Relax. delay 1.300 sec

Pulse 53.8 degrees

Acq. time 1.000 sec

Width 28040.7 Hz

704 repetitions

OBSERVE C13, 100.5671761 MHz

DECOUPLE H1, 399.9506784 MHz

Power 40 dB

continuously on

WALTZ-16 modulated

DATA PROCESSING

Line broadening 1.0 Hz

FT size 65536

Total time 6 hr, 24 min, 59 sec

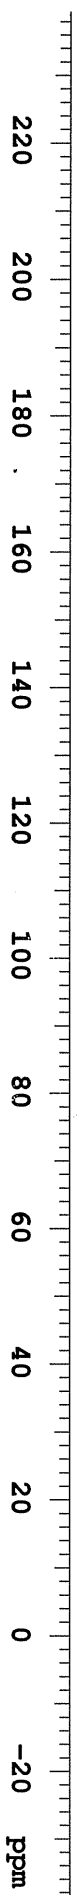

lyd-1-206-4

File: nmr500/Zhang/y1uo/lyd-1-206-4.fid

Pulse Sequence: s2pul

Solvent: cdcl3

Ambient temperature

Operator: y1uo

File: lyd-1-206-4

INOVA-500 "nmrserver"

Relax. delay 4.800 sec

Pulse 74.9 degrees

Acq. time 2.500 sec

Width 8002.4 Hz

16 repetitions

OBSERVE H1, 499.8560505 MHz

DATA PROCESSING

Line broadening 0.2 Hz

FW size 32768

Total time 0 min, 0 sec

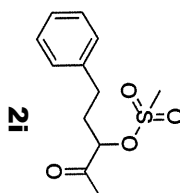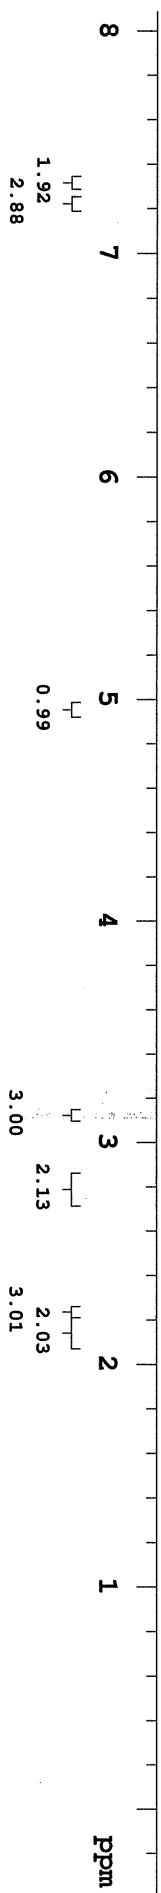

lyd-1-206-4-c

File: nmr400/Zhang/y1uo/lyd-1-206-4-c.fid

Pulse Sequence: s2pul1

Solvent: cdd13

Ambient temperature

Operator: y1uo

File: lyd-1-206-4-c

INOVA-500 "nmrserver"

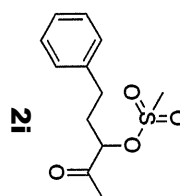

Relax. delay 1.300 sec

Pulse 53.8 degrees

Acq. time 1.000 sec

Width 28040.7 Hz

1164 repetitions

OBSERVE C13, 100.5671761 MHz

DECOUPLE H1, 399.9506784 MHz

Power 40 dB

continuously on

WALTZ-16 modulated

DATA PROCESSING

Line broadening 1.0 Hz

FT size 65536

Total time 7 hr, 41 min, 56 sec

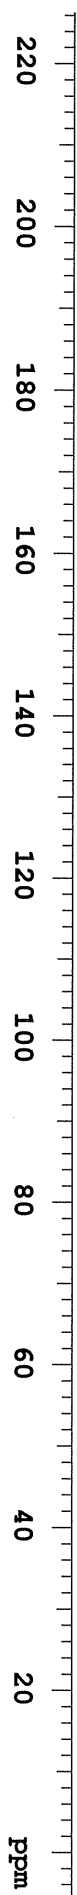

lyd-1-208-3

File: nmr500/Zhang/Yluo/lyd-1-208-3.fid

Pulse Sequence: s2pul

Solvent: cdcl3  
Ambient temperature  
Operator: Yluo  
File: lyd-1-208-3  
INOVA-500 "nmrserver"

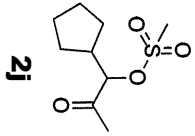

Relax. delay 4.800 sec  
Pulse 74.9 degrees  
Acq. time 2.500 sec  
Width 8002.4 Hz  
28 repetitions  
OBSERVE H1, 499.8560510 MHz  
DATA PROCESSING  
Line broadening 0.2 Hz  
FT size 32768  
Total time 0 min, 0 sec

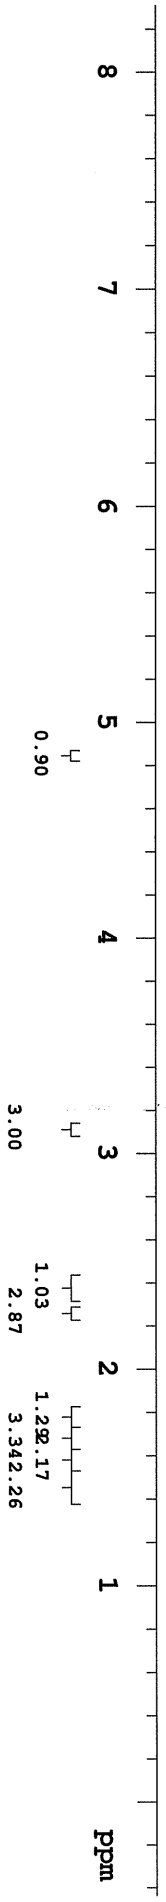

lyd-1-208-3-c

File: nmr400/Zhang/yjwo/lyd-1-208-3-c.fid

Pulse Sequence: s2pul1

Solvent: cdcl3

Ambient temperature

Operator: yjwo

File: lyd-1-208-3-c

INOVA-500 "nmrserver"

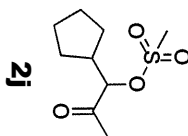

Relax. delay 1.300 sec

Pulse 53.8 degrees

Acq. time 1.000 sec

Width 28040.7 Hz

976 repetitions

OBSERVE C13, 100.5671753 MHz

DECOUPLE H1, 399.9506784 MHz

Power 40 dB

continuously on

WALTZ-16 modulated

DATA PROCESSING

Line broadening 1.0 Hz

FW size 65536

Total time 6 hr, 24 min, 59 sec

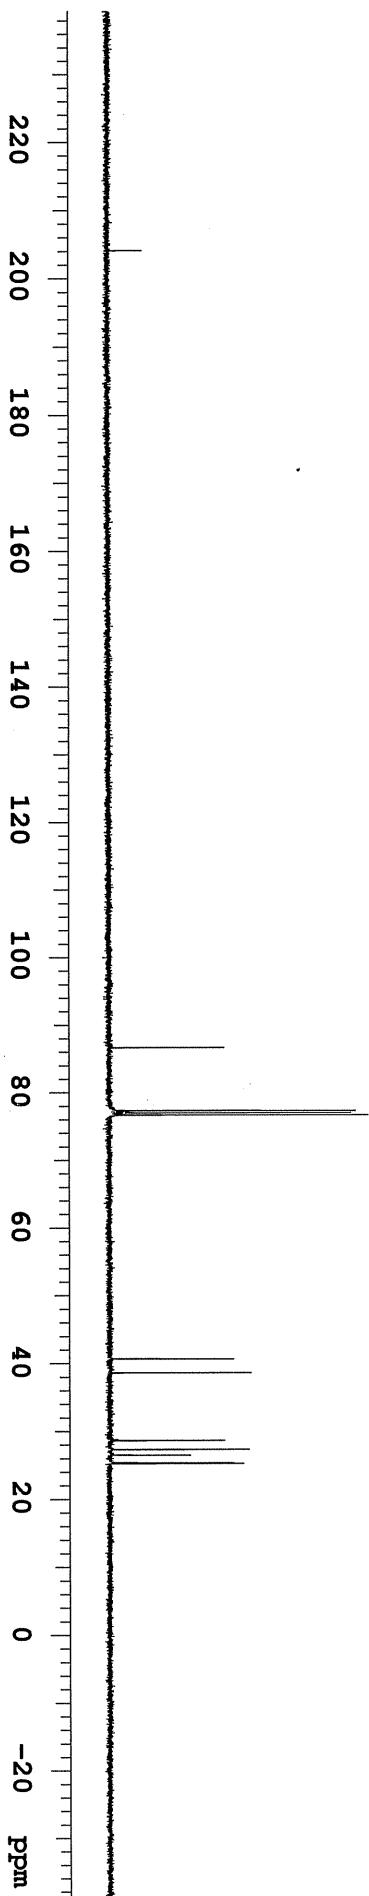

lyd-1-207-3

File: nmr500/Zhang/Yluo/lyd-1-207-3.fid

Pulse Sequence: s2pul1

Solvent: cdcl3

Ambient temperature

Operator: yluo

File: lyd-1-207-3

INOVA-500 "mrserver"

Relax. delay 4.800 sec

Pulse 74.9 degrees

Acq. time 2.500 sec

Width 8002.4 Hz

12 repetitions

OBSERVE H1, 499.8560510 MHz

DATA PROCESSING

Line broadening 0.2 Hz

FT size 32768

Total time 0 min, 0 sec

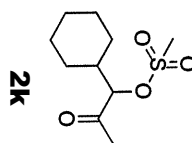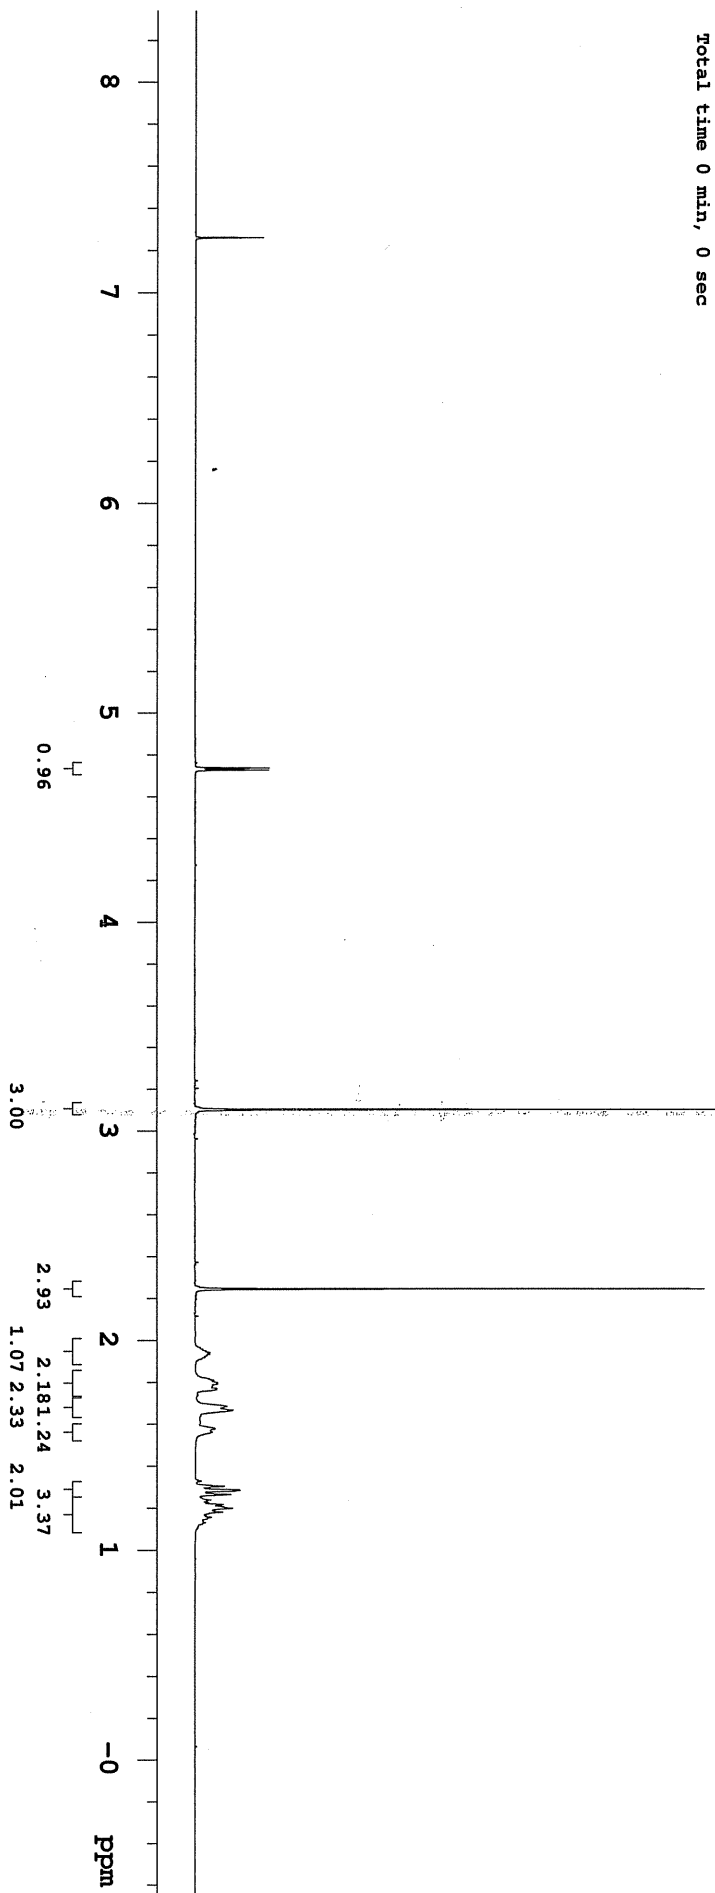



lyd-1-207-3--c

File: mmr400/Zhang/y1uo/lyd-1-207-3-c.fid

Pulse Sequence: s2pul

Solvent: cdc13

Ambient temperature

Operator: y1uo

File: lyd-1-207-3-c

INOVA-500 "nmrserver"

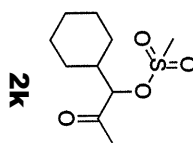

Relax. delay 1.300 sec

Pulse 53.8 degrees

Acq. time 1.000 sec

Width 28040.7 Hz

948 repetitions

OBSERVE C13, 100.5671761 MHz

DECOUPLE H1, 399.9506784 MHz

Power 40 dB

continuously on

WALTZ-16 modulated

DATA PROCESSING

Line broadening 1.0 Hz

FT size 65536

Total time 7 hr, 41 min, 56 sec

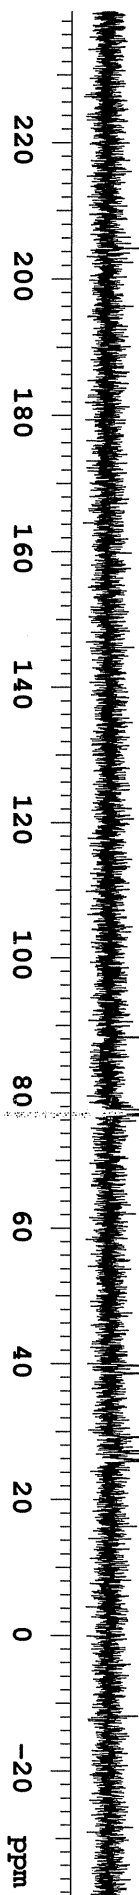

lyd-1-228-0309

File: nmr400/Zhang/y1uo/lyd-1-228-0309.fid

Pulse Sequence: s2pul

Solvent: cdcl3  
Ambient temperature  
Operator: y1uo  
File: lyd-1-228-0309  
INOVA-500 "nmrserver"

Relax. delay 4.800 sec  
Pulse 75.0 degrees  
Acq. time 2.500 sec  
Width 8002.4 Hz  
8 repetitions  
OBSERVE H1, 399.9486723 MHz  
DATA PROCESSING  
Line broadening 0.2 Hz  
FT size 65536  
Total time 14 min, 39 sec

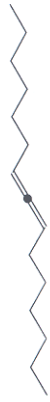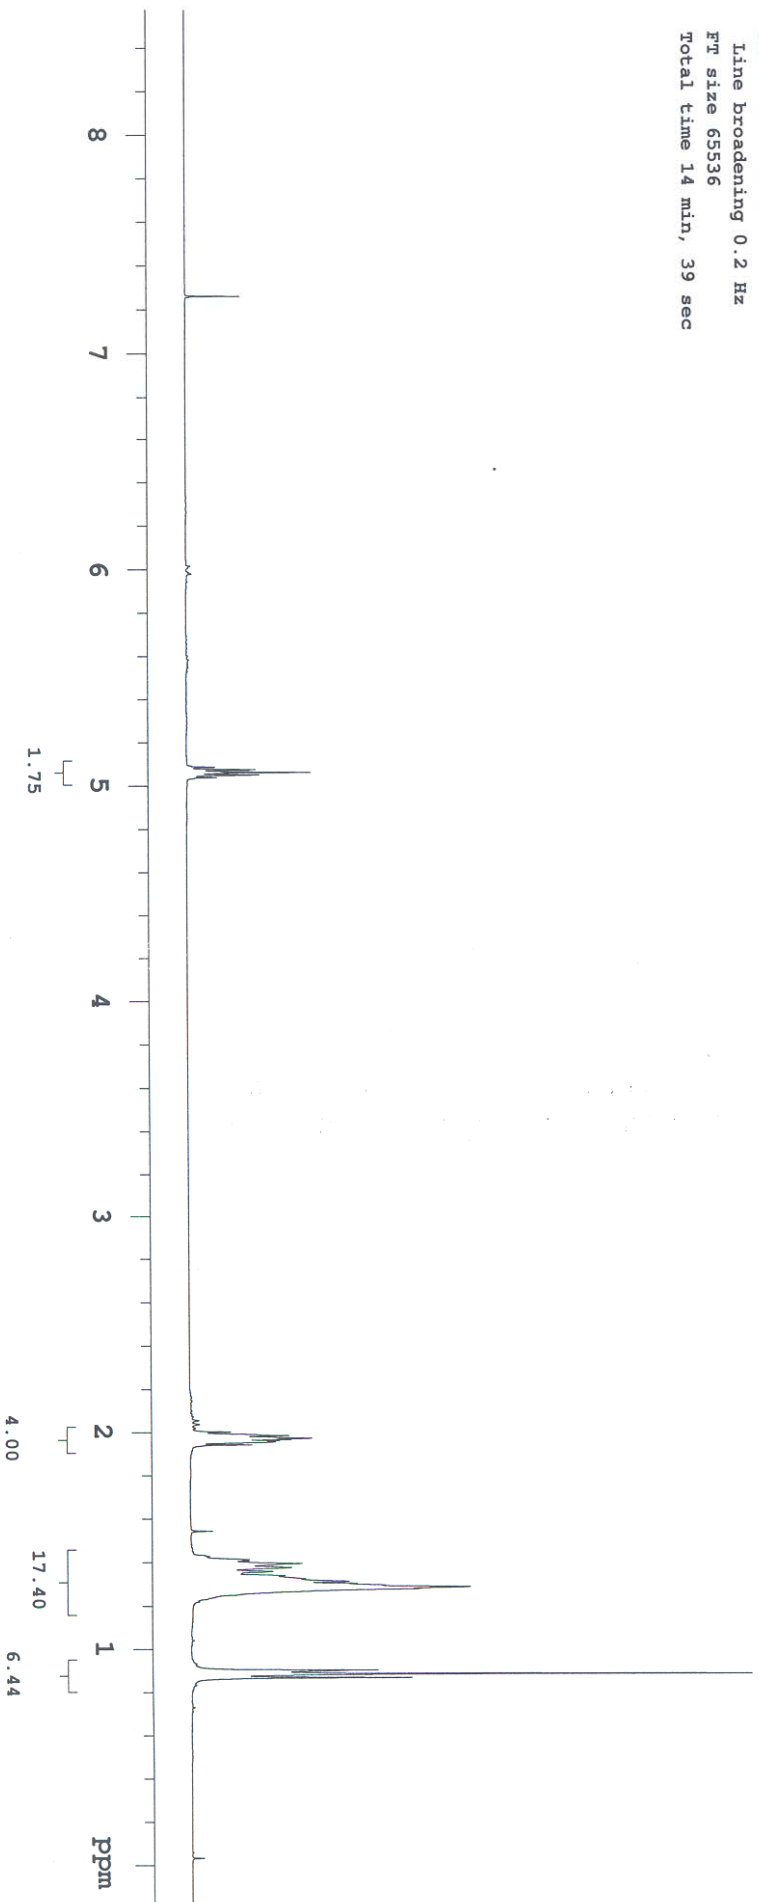

lyd-1-228-C

File: nmr400/Zhang/Yluc/lyd-1-228-C.fid

Pulse Sequence: s2pul

Solvent: cdcl3  
Ambient temperature  
Operator: Yluc  
File: lyd-1-228-C  
INOVA-500 "nmrserver"

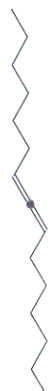

Relax. delay 1.300 sec  
Pulse 53.8 degrees  
Acq. time 1.000 sec  
Width 28040.7 Hz  
24 repetitions  
OBSERVE C13, 100.5671736 MHz  
DECOUPLE H1, 399.9506784 MHz  
Power 40 dB  
continuously on  
WALTZ-16 modulated  
DATA PROCESSING  
Line broadening 1.0 Hz  
FT size 65536  
Total time 6 hr, 24 min, 59 sec

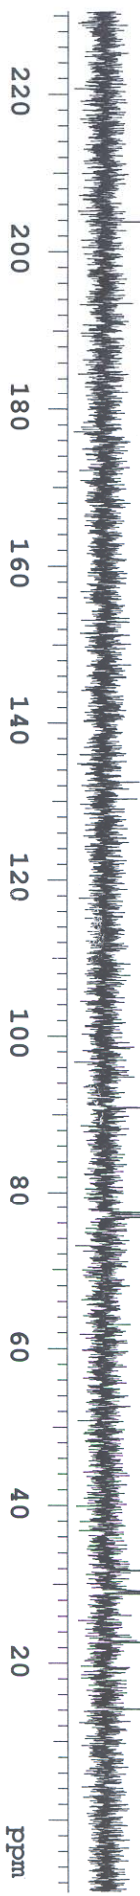

Supplement: Beilstein_J_Org_Chem-07-596-s002.pdf [file Beilstein_J_Org_Chem-07-596-s002.pdf]
